# Supplementary material
Source: PubMed Central journal article supplement (PMC3044203)
Supplement: supp_kfq375_toxsci-10-0846-File007.pdf [file supp_kfq375_toxsci-10-0846-File007.pdf]

| <b>SNP</b> | <b>Gene</b> | <b>P</b> |
|------------|-------------|----------|
| rs3828599  | GPX3        | 0.0018   |
| rs1925860  | ABCC4       | 0.0020   |
| rs10508010 | ABCC4       | 0.0025   |
| rs1925856  | ABCC4       | 0.0040   |
| rs17310467 | GSS         | 0.0042   |
| rs7987903  | ABCC4       | 0.0048   |
| rs1751043  | ABCC4       | 0.0060   |
| rs1189434  | ABCC4       | 0.0060   |
| rs4715359  | GSTA3       | 0.0068   |
| rs2074451  | GPX4        | 0.0079   |
| rs1377392  | GCLC        | 0.0088   |
| rs1189436  | ABCC4       | 0.0090   |
| rs1189437  | ABCC4       | 0.0111   |
| rs766606   | ABCC4       | 0.0121   |
| rs16950190 | ABCC4       | 0.0127   |
| E4p254     | GSTM1       | 0.0130   |
| rs9367532  | GCLC        | 0.0157   |
| rs707148   | GPX3        | 0.0173   |
| rs1766908  | ABCC4       | 0.0188   |
| rs8177426  | GPX3        | 0.0194   |
| rs2748991  | GSTA2       | 0.0208   |
| rs1356553  | GCLC        | 0.0212   |
| rs1925851  | ABCC4       | 0.0228   |
| rs7329514  | ABCC4       | 0.0239   |
| rs6922172  | GCLC        | 0.0260   |
| rs8191438  | GSTP1       | 0.0270   |
| rs3746165  | GPX4        | 0.0278   |
| rs9590150  | ABCC4       | 0.0278   |
| rs2397132  | GSTA3       | 0.0280   |
| rs9590154  | ABCC4       | 0.0280   |
| rs2737844  | GPX2        | 0.0297   |
| rs1189439  | ABCC4       | 0.0309   |
| rs1764425  | ABCC4       | 0.0320   |
| rs4773861  | ABCC4       | 0.0334   |
| rs8001657  | ABCC4       | 0.0334   |
| rs8191439  | GSTP1       | 0.0340   |
| rs4148411  | ABCC3       | 0.0341   |
| rs11070109 | ABCC4       | 0.0380   |
| rs1989983  | ABCC3       | 0.0384   |
| rs12120268 | GPX7        | 0.0398   |
| l6m18      | GSTP1       | 0.0400   |
| rs16950155 | ABCC4       | 0.0416   |
| rs3957358  | GCLC        | 0.0418   |
| rs12584534 | ABCC4       | 0.0437   |
| rs2397105  | GSTA1       | 0.0480   |

Supplemental Table 1. Association between “glutathione pathway” SNPs and NAPQI IC50. SNPs with  $p < 0.05$  are listed.

| <b>"Glutathione Pathway" Basal Expression vs. NAPQI IC50</b> |              |          |          |
|--------------------------------------------------------------|--------------|----------|----------|
| <b>Probeset ID</b>                                           | <b>Gene</b>  | <b>p</b> | <b>r</b> |
| 202967_at                                                    | <i>GSTA4</i> | 0.001    | -0.24    |
| 235405_at                                                    | <i>GSTA4</i> | 0.006    | -0.21    |
| 222102_at                                                    | <i>GSTA3</i> | 0.020    | -0.17    |
| 211630_s_at                                                  | <i>GSS</i>   | 0.034    | -0.16    |
| 205439_at                                                    | <i>GSTT2</i> | 0.046    | -0.15    |

Supplemental Table 2. Association between basal expression of "glutathione pathway" mRNA expression and NAPQI IC<sub>50</sub>, for probes with p<0.05. The Affymetrix U133 Plus 2.0 probeset ID is listed, together with the gene name, unadjusted p-value and Pearson's correlation.

| SNP ID     | Chromosome | Gene         | Position  | MAF  | p-value | q-value | Correlation |
|------------|------------|--------------|-----------|------|---------|---------|-------------|
| rs3825924  | 15         | ALDH1A3      | 99263423  | 0.24 | 1.73E-5 | 0.991   | -0.34       |
| rs1343151  | 1          | IL23R        | 67491717  | 0.34 | 1.91E-5 | 0.991   | -0.33       |
| rs11766607 | 7          | LOC100130122 | 49490165  | 0.13 | 2.06E-5 | 0.991   | -0.34       |
| rs17640676 | 2          | KCNJ3        | 155356065 | 0.22 | 2.09E-5 | 0.991   | -0.33       |
| rs10110651 | 8          | KCNU1        | 36966273  | 0.28 | 2.14E-5 | 0.991   | 0.33        |
| rs7665426  | 4          | KIAA1712     | 175562261 | 0.26 | 2.17E-5 | 0.991   | -0.33       |
| rs4869233  | 5          | MCTP1        | 94451298  | 0.28 | 2.28E-5 | 0.991   | -0.33       |
| rs16851554 | 2          | SPAG16       | 214732637 | 0.17 | 2.46E-5 | 0.991   | -0.33       |
| rs3208829  | 6          | LAMA4        | 112679982 | 0.15 | 2.54E-5 | 0.991   | -0.33       |
| rs11153350 | 6          | LAMA4        | 112685077 | 0.15 | 2.54E-5 | 0.991   | -0.33       |
| rs3746923  | 21         | UBASH3A      | 42699413  | 0.48 | 2.56E-5 | 0.991   | -0.33       |
| rs9784215  | 21         | UBASH3A      | 42696805  | 0.48 | 2.73E-5 | 0.991   | -0.33       |
| rs319590   | 5          | PCBD2        | 134282687 | 0.17 | 2.76E-5 | 0.991   | -0.33       |
| rs6502555  | 17         | GARNL4       | 2676402   | 0.33 | 3.11E-5 | 0.991   | 0.32        |
| rs9473932  | 6          | FTHP1        | 50965954  | 0.32 | 3.26E-5 | 0.991   | 0.33        |
| rs3744198  | 17         | C17orf28     | 70467719  | 0.24 | 3.40E-5 | 0.991   | 0.32        |
| rs2082603  | 4          | LOC391719    | 179912389 | 0.32 | 3.43E-5 | 0.991   | 0.32        |
| rs17469886 | 8          | CCDC25       | 27639247  | 0.06 | 3.52E-5 | 0.991   | -0.32       |
| rs11909987 | 21         | UBASH3A      | 42695471  | 0.47 | 3.62E-5 | 0.991   | -0.32       |
| rs6789170  | 3          | LOC285205    | 109072241 | 0.06 | 3.63E-5 | 0.991   | 0.32        |
| rs908262   | 2          | HDAC4        | 239882459 | 0.17 | 3.71E-5 | 0.991   | 0.32        |
| rs9997440  | 4          | LOC645716    | 30817709  | 0.10 | 3.83E-5 | 0.991   | 0.32        |
| rs7526132  | 1          | MFSD4        | 203820708 | 0.35 | 3.87E-5 | 0.991   | 0.32        |
| rs4563418  | 3          | LOC344653    | 88562476  | 0.26 | 3.87E-5 | 0.991   | 0.32        |
| rs10485114 | 6          | FRK          | 116235599 | 0.22 | 4.01E-5 | 0.991   | -0.32       |
| rs10849421 | 12         | CD9          | 6197269   | 0.37 | 4.15E-5 | 0.991   | 0.32        |
| rs10515465 | 5          | PCBD2        | 134295456 | 0.16 | 4.69E-5 | 0.991   | -0.32       |
| rs11129122 | 3          | UBE2E2       | 23687620  | 0.21 | 4.97E-5 | 0.991   | -0.32       |
| rs718068   | 8          | LOC100129163 | 21147176  | 0.25 | 5.25E-5 | 0.991   | -0.32       |
| rs4764486  | 12         | CD9          | 6198250   | 0.38 | 5.27E-5 | 0.991   | 0.32        |
| rs7726138  | 5          | LOC728979    | 86158523  | 0.33 | 5.44E-5 | 0.991   | -0.32       |
| rs6737742  | 2          | HDAC4        | 239880958 | 0.13 | 5.53E-5 | 0.991   | 0.32        |
| rs2720667  | 8          | PVT1         | 129152766 | 0.27 | 5.73E-5 | 0.991   | 0.31        |
| rs777952   | 3          | ALCAM        | 105929378 | 0.31 | 5.73E-5 | 0.991   | 0.31        |
| rs1372940  | 18         | DSC3         | 26271917  | 0.07 | 5.74E-5 | 0.991   | -0.31       |
| rs4585742  | 8          | CPA6         | 68897323  | 0.24 | 6.05E-5 | 0.991   | -0.31       |
| rs11248859 | 16         | CACNA1H      | 1181998   | 0.27 | 6.18E-5 | 0.991   | 0.32        |
| rs2524290  | 11         | RAB3IL1      | 61444250  | 0.36 | 6.19E-5 | 0.991   | 0.31        |
| rs12700386 | 7          | LOC541472    | 22729534  | 0.12 | 6.20E-5 | 0.991   | -0.31       |
| rs6032545  | 20         | DNTTIP1      | 43856112  | 0.45 | 6.48E-5 | 0.991   | 0.32        |
| rs3799732  | 6          | TPD52L1      | 125616208 | 0.48 | 6.49E-5 | 0.991   | -0.31       |
| rs319594   | 5          | PCBD2        | 134278045 | 0.16 | 6.51E-5 | 0.991   | -0.31       |
| rs2567513  | 17         | SLC39A11     | 68204335  | 0.18 | 6.66E-5 | 0.991   | -0.31       |
| rs12267329 | 10         | ADARB2       | 1665548   | 0.38 | 6.71E-5 | 0.991   | 0.31        |
| rs6878801  | 5          | RPS17P2      | 116235804 | 0.50 | 6.77E-5 | 0.991   | -0.31       |
| rs9508207  | 13         | KIAA0774     | 28456694  | 0.22 | 6.79E-5 | 0.991   | 0.31        |

|            |    |              |           |      |         |       |       |
|------------|----|--------------|-----------|------|---------|-------|-------|
| rs1599096  | 8  | LOC100129163 | 21162504  | 0.28 | 6.86E-5 | 0.991 | -0.31 |
| rs10186482 | 2  | NEB          | 152190223 | 0.47 | 6.87E-5 | 0.991 | 0.31  |
| rs2720666  | 8  | PVT1         | 129152641 | 0.28 | 6.93E-5 | 0.991 | 0.31  |
| rs948999   | 11 | hCG_2032978  | 130203749 | 0.40 | 6.95E-5 | 0.991 | 0.31  |
| rs16900696 | 5  | LOC100128783 | 31149171  | 0.07 | 7.12E-5 | 0.991 | 0.31  |
| rs4289753  | 7  | VWC2         | 49527140  | 0.16 | 7.19E-5 | 0.991 | -0.31 |
| rs1536343  | 13 | NHLRC3       | 38573421  | 0.05 | 7.28E-5 | 0.991 | 0.31  |
| rs2209631  | 13 | NHLRC3       | 38573022  | 0.05 | 7.28E-5 | 0.991 | 0.31  |
| rs8081984  | 17 | FBXO39       | 6627290   | 0.08 | 7.46E-5 | 0.991 | -0.32 |
| rs10852886 | 17 | FBXO39       | 6633565   | 0.48 | 7.50E-5 | 0.991 | -0.31 |
| rs6083315  | 20 | CST5         | 23811795  | 0.43 | 7.52E-5 | 0.991 | -0.31 |
| rs1380292  | 8  | LOC100129163 | 21148688  | 0.24 | 7.64E-5 | 0.991 | -0.31 |
| rs3857596  | 6  | FTHP1        | 51013026  | 0.15 | 7.75E-5 | 0.991 | 0.31  |
| rs4715210  | 6  | FTHP1        | 51005210  | 0.15 | 7.75E-5 | 0.991 | 0.31  |
| rs943005   | 6  | FTHP1        | 50973779  | 0.14 | 7.78E-5 | 0.991 | 0.31  |
| rs1354510  | 1  | LMX1A        | 163442139 | 0.30 | 7.78E-5 | 0.991 | 0.31  |
| rs13204006 | 6  | LOC729177    | 22054591  | 0.15 | 7.85E-5 | 0.991 | -0.31 |
| rs13326165 | 3  | STAB1        | 52507158  | 0.15 | 7.92E-5 | 0.991 | -0.31 |
| rs6553786  | 4  | KIAA1712     | 175537179 | 0.24 | 8.16E-5 | 0.991 | -0.31 |
| rs6810790  | 4  | SLIT2        | 20124768  | 0.13 | 8.17E-5 | 0.991 | -0.31 |
| rs6124741  | 20 | WFDC3        | 43838054  | 0.46 | 8.31E-5 | 0.991 | 0.31  |
| rs4710625  | 6  | NUFIP1P      | 67554551  | 0.46 | 8.39E-5 | 0.991 | 0.31  |
| rs9473924  | 6  | RPS17L4      | 50942116  | 0.32 | 8.49E-5 | 0.991 | 0.31  |
| rs17413355 | 7  | MAGI2        | 77823519  | 0.10 | 8.50E-5 | 0.991 | -0.31 |
| rs7738812  | 6  | CNR1         | 88973322  | 0.07 | 8.52E-5 | 0.991 | -0.31 |
| rs2064504  | 20 | WFDC3        | 43837117  | 0.46 | 8.52E-5 | 0.991 | -0.31 |
| rs6949916  | 7  | LOC100130122 | 49504790  | 0.13 | 8.53E-5 | 0.991 | -0.31 |
| rs9984523  | 21 | TMPRSS2      | 41805901  | 0.08 | 8.76E-5 | 0.991 | 0.31  |
| rs10144421 | 14 | C14orf49     | 94981588  | 0.41 | 8.77E-5 | 0.991 | -0.31 |
| rs11611637 | 12 | MIRN135A2    | 96209495  | 0.26 | 8.78E-5 | 0.991 | -0.31 |
| rs279874   | 9  | DMRT1        | 943057    | 0.41 | 9.13E-5 | 0.991 | -0.31 |
| rs4495049  | 4  | LOC645841    | 127158603 | 0.08 | 9.43E-5 | 0.991 | -0.31 |
| rs13015146 | 2  | LOC645805    | 202770348 | 0.38 | 9.49E-5 | 0.991 | 0.31  |
| rs2218988  | 7  | CALD1        | 134214903 | 0.23 | 9.50E-5 | 0.991 | 0.31  |
| rs2089515  | 8  | IMPAD1       | 58089280  | 0.21 | 9.91E-5 | 0.991 | 0.30  |

Supplemental Table 3. SNPs associated with NAPQI IC<sub>50</sub> with p < 10<sup>-4</sup>.

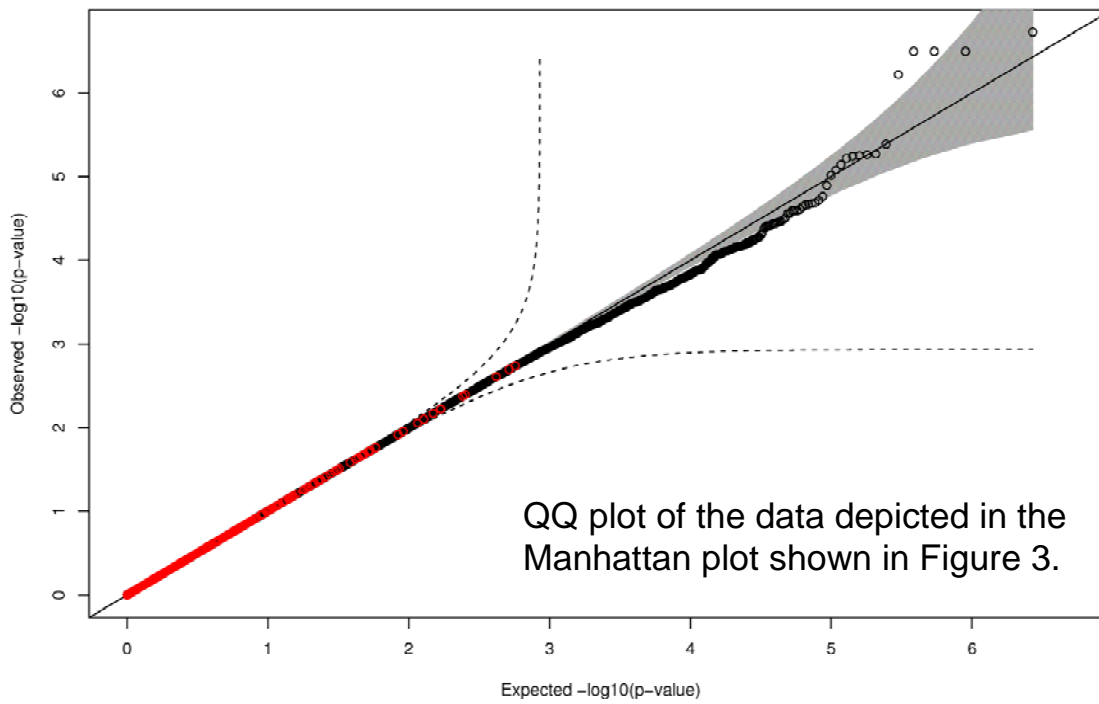

Supplemental Figure 1
